# Supplementary material
Source: PubMed Central journal article supplement (PMC2702218)
Supplement: NIHMS43384-supplement-01.pdf [file NIHMS43384-supplement-01.pdf]

```

EYG -----
TOE  MATSTSPGPTRTTAAIRVSLPGAAPAI PATATAGSQSPGAIMPMAAVPLPSHLQLLQSSA 60

EYG -----
TOE  GGVGQPAAITPV3PTAATTVLAQPHSLSPSTPFI LTQGA PPAALGGIFCGGSAAAGPGAA 120

EYG -----MSQHRLLLEFSRFGLRGYDIAQHMLTQQGAVSKLLGSLRPPGLIGGSKEK 50
TOE  AAAATNLNALASQHRLLLELSRFGLRGYDLAQHMLSQGAVSKLLGLTLPAPGLIGGSKEK 179
      *****
      *****

EYG  VATPTVVSKIEQYKRENPTIFAKEIKERLISEGVCTNATAPSVSSINRILAKRRAERVAT 110
TOE  VATPTVVSKIEQYKRENPTIFAKEIKERLITEGVCTNATAPSVSSINRILAKRRAERAAA 239
      *****

EYG  EFARTAAYG--LYPPFPHPYGSFTWHPAGNVPGGQGVPPPPP---PSALWSVVAF----- 160
TOE  EFARAASYGYA IHPTHPHPTYSFPTWPAHHPLMGAVPLATPPGGGPAGAGGALQPGGSGS 299
      *****

EYG  -----TLANLPPSAASAVPVSTCGSLSSAHLMAGGAGGTP--TNRAISPGSGSHDTLES 212
TOE  SYGSDGNMSSNPNSSNSNNTTHSNQHNTNSGSGGGDSSAGSGRLSLPALSFDGSGSRDSRSP 359
      .....

EYG  -ADENRHIDSDYLD---DDEPKFRNRRTTFSPEQLERLEKEFDKSHYPCVSTRERLSS 267
TOE  DADANRMI DIEGEDSESDQPKFRNRRTTFSPEQLDELEKEFDKSHYPCVNTREKLA 419
      *****

EYG  RTSLSEARVQVWF SNKRAKWRRHQRVNLKRRSSPANPLRSGQSNDA PASSPTPSNHSS 327
TOE  RTALSEARVQVWF SNKRAKWRRHQRVNLKRRSDSPS-----TSSSPTPLVNPV 467
      *****

EYG  ASTSAPVAVPFPFQQLPLOGDHSPOGFPPSVLLHPLHGPPGGHHHHHPLHLPTHPAALQ 387
TOE  VS---PVSPIP---VFPVAVPESGQOKQF-----YFYSTSNMCNTSSSSS 507
      *****

EYG  LLSHYHQGGGGGGGGGGGGGGGGGGGGGGGGGGGGGGGGGGGGGGGGGGGGGGGGGGGGGG 447
TOE  NSQPCNTINFGSKMSSKNTSSVSSNQHMKEPAAAVATASPTASAPLSMGGENSAPRALPMT 567
      .....

EYG  PSAAAFLGLARQYAVAASLTVAEEQSRRLHYSAGGLGSGGEGTGPHNTTTQSGGSTMTVD 507
TOE  LPMP--MTLPTASAAAFALS FARQY IAKYMGTPLNIGHGSSPIQAQSGRDMQSEERLEYD 625
      *****

EYG  NSSSDSDREINVDSDRW 525
TOE  E--QEEBEVINVERDAE- 640
      *****

```

NT

B

CT

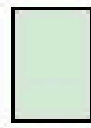 = PD     = HD

Figure 1 Supplemental Data. Alignment of EYG and TOE

Table 1. Expression of full-length Eyg and Toe have differing phenotypic effects during development

| <b>GAL4 Driver</b>        | <b>Tissue(s)</b>                                | <b>Reference</b>            | <b>UAS-eyg FL</b>     | <b>UAS-toe FL</b>                     |
|---------------------------|-------------------------------------------------|-----------------------------|-----------------------|---------------------------------------|
| P{GawB}55B                | adult follicle cells, embryonic salivary gland  | Brand and Perrimon, 1994    | no effect             | pupal lethal                          |
| P{GawB}C1003              | embryonic CNS, PNS and epidermins               | Jarvik et al., 1996         | lethal                | no effect                             |
| P{GawB}c315a              | optic and laminar anlagen                       | Manseau et al., 1997        | no effect             | pupal lethal                          |
| P{GawB}c768               | embryonic CNS and brain                         | Manseau et al., 1997        | lethal                | no effect                             |
| P{w[+mC]=GAL4-nos.NGT}40  | broad pattern in early embryogenesis            | Barrett et al., 1997        | no effect             | loss of thorax and scutellar bristles |
| P{w[+mC]=GAL4-Kr.C}DC1    | bolwig organ, ectoderm, amnioserosa & fat body  | Castelli-Gair et al., 1994  | lethal                | no effect                             |
| P{GawB}lzgal4             | photoreceptors cone and pigment cells           | Crew et al., 1997           | smooth eye            | lethal                                |
| P{Lsp2-GAL4.H}3           | larval fat body                                 | Reiling and Hafen 2004      | no effect             | pupal lethal                          |
| P{GawB}SG18.1             | pupal and adult olfactory neurons               | Jhaveri and Rodrigues, 2002 | no effect             | lethal                                |
| P{w[+mC]=ato-GAL4.3.6}14a | embryonic and larval brain, ESOP cells          | Hassan et al., 2000         | no effect             | pupal lethal                          |
| P{GawB}cb11               | eye antennal disc, brain, CNS                   | Ward et al., 2002           | no effect             | lethal                                |
| P{w[+mW.hs]=GawB}cb34     | wing disc                                       | Ward et al., 2002           | no effect             | wings fail to inflate                 |
| P{w[+mW.hs]=GawB}cb39     | brain, CNS                                      | Ward et al., 2002           | rough eye             | lethal                                |
| P{w[+mC]=eve.st3-GAL4.S}8 | embryonic even-skipped stripe 3                 | Sharma et al., 2002         | no effect             | lethal                                |
| P{J21.17-GAL4}JO15        | Johnston's organ                                | Sharma et al., 2002         | no effect             | larval lethal                         |
| P{GAL4-vg.M}2             | wing disc                                       | Bourouis, 2002              | no effect             | cell death in wing                    |
| P{GawB}c309               | thoracic ganglion, mushroom body                | Connolley et al., 1996      | wing & thorax defects | larval lethal                         |
| P{GawB}(2)c855[c855]      | malpighian tubule type 1 cell                   | Sozen et al 1997            | no effect             | wings fail to inflate                 |
| P{GawB}109-28             | follicle cells of the dorsal appendage          | Younger, 2001               | wings fail to inflate | larval lethal                         |
| P{w[+mC]=Rh6-GAL4.D}2     | subset of R8 photoreceptor neurons              | Ratnakumar and Desplan 2003 | no effect             | lethal                                |
| P{GawB}DJ628              | adult nervous system, cardia and testis         | Seroude, 2002               | no effect             | larval lethal                         |
| P{GawB}DJ651              | unknown cell types in adult                     | Seroude, 2002               | no effect             | wings fail to inflate                 |
| P{GawB}5015               | lymph gland                                     | Lopez, 1998                 | no effect             | lethal                                |
| P{GawB}LL54               | Visual Pigment Cells                            | Gu et al., 2004             | no effect             | lethal                                |
| P{GawB}cb28               | imaginal discs, brain, CNS                      | Ward et al., 2002           | wings fail to inflate | lethal                                |
| P{GawB}c825               | amnioserosa                                     | Sozen et al 1997            | no effect             | lethal                                |
| P{GawB}GII5               | embryonic peritracheal cells, pericardial cells | Younger, 2001               | no effect             | lethal                                |
| P{GAL4-tim.E}62           | circadian rhythm pattern of timeless gene       | Kaneko et al., 2000         | no effect             | lethal                                |
| w[*]; P{GawB}43           | embryonic glial cells and peripheral neurons    | Bossing et al., 2002        | no effect             | lethal                                |
| P{GawB}rn[GAL4-5]         | central region and notum of wing disc           | St. Pierre et al., 2002     | loss of wings         | lethal                                |
| P{GawB}pnr[MD237]         | amnioserosa, epidermis, proctodeum              | Calleja et al., 1996        | no effect             | lethal                                |
| P{GawB}c329b              | oocyte and follicle cells                       | Manseau et al., 1997        | no effect             | lethal                                |
| P{GawB}c204               | oocyte and follicle cells                       | Manseau et al., 1997        | no effect             | lethal                                |
| P{GawB}(3)31-1[31-1]      | embryonic CNS and PNS                           | Brand and Perrimon, 1994    | no effect             | lethal                                |
| P{GawB}cb04               | In larva brain, CNS                             | Ward et al., 2002           | no effect             | lethal                                |
| P{GawB}cb19               | embryonic foregut and hindgut                   | Ward et al., 2002           | no effect             | lethal                                |
| P{GawB}cb29               | embryonic CNS and larval brain                  | Ward et al., 2002           | no effect             | lethal                                |
| P{GawB}cb40               | embryonic PNS                                   | Ward et al., 2002           | no effect             | lethal                                |
| P{Pdf-GAL4.P2.4}2         | embryonic brain and CNS                         | Park, 2003                  | no effect             | lethal                                |
| P{GawB}C833               | CNS and PNS, larval brain, eye, wing            | Hrdlicka et al., 2002       | no effect             | lethal                                |
| P{GawB}DII[md23]          | embryonic head segments, leg & antennal disc    | Calleja et al., 1996        | lethal                | no effect                             |
| P{GawB}c81                | larval brain and CNS                            | Manseau et al., 1997        | lethal                | no effect                             |
| P{GAL4E69}puc[GAL4E69]    | embryonic epidermis                             | Adachi-Yamada, 2002         | lethal                | no effect                             |

**Table 2. Differing phenotypes resulting from the expression of Eyg and Toe variants**

|                          | <u>ey-GAL4</u> | <u>GMR-GAL4</u> | <u>109.69-GAL4</u> | <u>Eh2.4-GAL4</u> | <u>109.28-GAL4</u> | <u>ap-GAL4</u> |
|--------------------------|----------------|-----------------|--------------------|-------------------|--------------------|----------------|
| <u>Deletion Proteins</u> |                |                 |                    |                   |                    |                |
| EYG FL                   | rough eye      | smooth eye      | rough eye          | wing defect       | wing defect        | emb. lethal    |
| EYG ΔNT                  | NE             | NE              | NE                 | NE                | NE                 | NE             |
| EYG ΔNT+PD               | NE             | NE              | NE                 | NE                | NE                 | NE             |
| EYG ΔB                   | eye loss       | smooth eye      | eye loss           | wing defect       | wing defect        | emb. lethal    |
| EYG ΔHD                  | NE             | NE              | NE                 | NE                | NE                 | NE             |
| EYG ΔCT                  | NE             | NE              | NE                 | NE                | NE                 | NE             |
| EYG ΔNT+CT               | NE             | NE              | NE                 | NE                | NE                 | NE             |
| EYG ΔNT+B+CT             | NE             | NE              | NE                 | NE                | NE                 | NE             |
| <br>                     |                |                 |                    |                   |                    |                |
| TOE FL                   | small eye      | smooth eye      | rough eye          | NE                | NE                 | emb. lethal    |
| TOE ΔNT                  | NE             | NE              | NE                 | NE                | NE                 | NE             |
| TOE ΔNT+PD               | NE             | NE              | NE                 | NE                | NE                 | NE             |
| TOE ΔB                   | small eye      | rough eye       | rough eye          | wing defect       | wing defect        | emb. lethal    |
| TOE ΔHD                  | rough eye      | smooth eye      | rough eye          | NE                | NE                 | emb. lethal    |
| TOE ΔCT                  | NE             | NE              | NE                 | NE                | NE                 | NE             |
| TOE ΔNT+CT               | NE             | NE              | NE                 | NE                | NE                 | NE             |
| TOE ΔNT+B+CT             | NE             | NE              | NE                 | NE                | NE                 | NE             |
| <br>                     |                |                 |                    |                   |                    |                |
| <u>Chimeric Proteins</u> |                |                 |                    |                   |                    |                |
| EYG/TOE NT               | eye loss       | smooth eye      | rough eye          | wing defect       | wing defect        | emb. lethal    |
| EYG/TOE PD               | rough eye      | smooth eye      | rough eye          | wing defect       | NE                 | emb. lethal    |
| EYG/TOE B                | rough eye      | smooth eye      | rough eye          | wing defect       | NE                 | emb. lethal    |
| EYG/TOE HD               | rough eye      | smooth eye      | rough eye          | wing defect       | wing defect        | emb. lethal    |
| EYG/TOE CT               | NE             | smooth eye      | rough eye          | wing defect       | NE                 | emb. lethal    |
| EYG/TOE NT+CT            | eye loss       | pupal lethal    | eye loss           | wing defect       | NE                 | emb. lethal    |
| EYG/TOE PD+HD            | rough eye      | smooth eye      | rough eye          | wing defect       | NE                 | emb. lethal    |
